# Supplementary material
Source: PubMed Central journal article supplement (PMC4007953)

## Supporting Information

### **[Au<sub>2</sub>(phen<sup>2Me</sup>)<sub>2</sub>(μ-O)<sub>2</sub>](PF<sub>6</sub>)<sub>2</sub>, a novel dinuclear gold(III) complex showing excellent antiproliferative properties.**

Maria A. Cinellu,<sup>\*,†</sup> Laura Maiore,<sup>†</sup> Mario Manassero,<sup>‡</sup> Angela Casini,<sup>§</sup> Massimiliano Arca,<sup>¶</sup> Heinz-Herbert Fiebig,<sup>‡</sup> Gerhard Kelter,<sup>‡</sup> Elena Michelucci,<sup>β</sup> Giuseppe Pieraccini,<sup>β</sup> Chiara Gabbiani,<sup>π</sup> Luigi Messori<sup>\*,π</sup>

<sup>†</sup>Department of Chemistry, University of Sassari, Via Vienna 2, 07100 Sassari, Italy, <sup>‡</sup>Department of Structural Chemistry and Inorganic Stereochemistry, University of Milano, Via Venezian 21, 20133 Milano, Italy, <sup>§</sup>Institut des Sciences et Ingénierie Chimiques, Ecole Polytechnique Fédérale de Lausanne (EPFL) CH-1015 Lausanne, Switzerland, <sup>¶</sup>Department of Inorganic and Analytical Chemistry, University of Cagliari, S.S. 554 bivio per Sestu, 09042 Monserrato (CA), Italy, <sup>‡</sup>Institute for Experimental Oncology, Oncotest GmbH, Am Flughafen 12-14, D-79108 Freiburg, Germany, <sup>β</sup>Mass Spectrometry Centre (CISM), University of Florence, Via U. Schiff 6, 50019 Sesto Fiorentino, Firenze, Italy and University of Florence, <sup>π</sup>Department of Chemistry "Ugo Schiff", university of Florence, Via della Lastruccia 3, 50019 Sesto Fiorentino, Firenze, Italy.

## Experimental Section

### General experimental details

Solvents were purchased from Carlo Erba Reagenti and distilled prior to use, while MeCN was used as received. Elemental analyses were performed with a Perkin-Elmer Elemental Analyzer 240B by Mr. A. Canu (Dipartimento di Chimica, Università di Sassari). Conductivity measurements were performed with a Philips PW 9505 conductimeter. Infrared spectra were recorded with a Jasco FTIR-480 Plus spectrophotometer using Nujol mulls; <sup>1</sup>H NMR spectra were recorded at 293 K with a Varian VXR 300 spectrometer operating at 300.0 MHz, chemical shifts are given in ppm relative to internal tetramethylsilane.

**Synthesis of [Au(phen<sup>2Me</sup>)(μ-O)]<sub>2</sub>[PF<sub>6</sub>]<sub>2</sub>, 1-(PF<sub>6</sub>)<sub>2</sub>.** To a stirred solution of [Au(phen<sup>2Me</sup>)Cl<sub>3</sub>] (511.7 mg, 1.0 mmol) in CH<sub>3</sub>CN (3 ml) were added an aqueous solution of AcONa (164.9 mg, 2.0 mmol, 100 ml) and KPF<sub>6</sub> (552.2 mg, 3.0 mmol). The resulting suspension was refluxed for about 3 hours until the colour

of the solid changed from orange to light pink. After cooling, the solid was collected by filtration and washed with H<sub>2</sub>O, EtOH, Et<sub>2</sub>O. The crude product was extracted with several portions of chloroform to remove some unreacted starting adduct. Recrystallization of the residue from CH<sub>3</sub>CN/Et<sub>2</sub>O afforded the analytical sample (368.3 mg, 65%). Mp 203°-204°C. Elemental analysis (%) calcd for C<sub>28</sub>H<sub>24</sub>Au<sub>2</sub>F<sub>12</sub>N<sub>4</sub>O<sub>2</sub>P<sub>2</sub>: C 29.70, H 2.14, N 4.95; found C 29.84, H 1.89, N 4.98.  $\Lambda_{\text{MAX}}$  (5x10<sup>-4</sup> mol·L<sup>-1</sup>, CH<sub>3</sub>CN) 246.6  $\Omega^{-1}\text{cm}^2\text{mol}^{-1}$ . Selected IR bands ( $n_{\text{max}}/\text{cm}^{-1}$ ): 842 s, 557 s, 687 m, 669 m. <sup>1</sup>H NMR (CD<sub>3</sub>CN)  $\delta$ : 3.22 (s, 6H, Me), 7.97 (d,  $J = 8.2$  Hz, 2H, CH-3 and CH-8), 8.18 (s, 2H, CH-5 and CH-6), 8.82 (d,  $J = 8.2$  Hz, 2H, CH-4 and CH-7).

**Synthesis of 1-(BAR<sub>4</sub>')<sub>2</sub>.** This could be obtained by methathesis reaction of 1-(PF<sub>6</sub>)<sub>2</sub> and Na[BAR<sub>4</sub>']. To a stirred suspension of 1-(PF<sub>6</sub>)<sub>2</sub> (100.7 mg, 0.09 mmol) in 50 ml of CH<sub>2</sub>Cl<sub>2</sub> a dichloromethane solution of NaBAR<sub>4</sub>' (157.8 mg, 0.18 mmol, 20 ml) was added. The resulting suspension was stirred at room temperature for about 30 minutes until most of the solid was solubilized. After this period, the suspension was filtered through Celite and the filtered solution concentrated to a small volume. Addition of diethyl ether to the concentrated solution gave 1-(BAR<sub>4</sub>')<sub>2</sub> (171.1 mg, 74%). Mp 142°C. Elemental analysis (%) calcd for C<sub>92</sub>H<sub>48</sub>Au<sub>2</sub>B<sub>2</sub>F<sub>48</sub>N<sub>4</sub>O<sub>2</sub>: C 43.01, H 1.88, N 2.18; found C 42.94, H 1.69, N 2.34.  $\Lambda_{\text{MAX}}$  (5x10<sup>-4</sup> mol·L<sup>-1</sup>, acetone) 169.9  $\Omega^{-1}\text{cm}^2\text{mol}^{-1}$ . Selected IR bands ( $n_{\text{max}}/\text{cm}^{-1}$ ): 682 m, 670 m, 550 s. <sup>1</sup>H NMR (CD<sub>3</sub>COCD<sub>3</sub>)  $\delta$ : 3.43 (s, 6H, Me), 7.67 (s, 8H, CH-4 BAR<sub>4</sub>'<sup>+</sup>), 7.79 (t, 16H, CH-2 and CH-5 BAR<sub>4</sub>'<sup>+</sup>), 8.25 (d,  $J = 8.4$  Hz, 2H, CH-3 and CH-8), 8.41 (s, 2H, CH-5 and CH-6), 9.13 (d,  $J = 8.4$  Hz, 2H, CH-4 and CH-7). X-ray quality crystals of 1-(BAR<sub>4</sub>')<sub>2</sub> were grown from slow diffusion of diethyl ether into a saturated dichloromethane solution of the complex.

**X-ray Data Collection and Structure Determination:** Crystal data are summarized in Ref. 16 in the published paper, and in the full Crystallographic Table **S1**. The diffraction experiment was carried out on a Bruker APEX II CCD area-detector diffractometer at 150 K, using MoK $\alpha$  radiation ( $\lambda = 0.71073$ ), with a graphite crystal monochromator in the incident beam. No crystal decay was observed, so that no time-decay correction was needed. The collected frames were processed with the software SAINT,<sup>1</sup> and an empirical absorption correction was applied (SADABS)<sup>2</sup> to the collected reflections. The calculations were performed using the Personal Structure Determination Package<sup>3</sup> and the physical constants tabulated therein.<sup>4</sup> The structure was solved by direct methods (SHELXS)<sup>5</sup> and refined by full-matrix least

<sup>1</sup> SAINT Reference manual, Siemens Energy and Automation, Madison, WI, **1994-1996**

<sup>2</sup> G.M. Sheldrick, SADABS, Empirical Absorption Correction Program, University of Gottingen, **1997**

<sup>3</sup> B.A. Frenz, *Comput. Phys.* **1988**, 2, 42

<sup>4</sup> *Crystallographic Computing 5*, Oxford University Press: Oxford, U.K., **1991**; Chapter 11, 126

<sup>5</sup> G.M. Sheldrick, (1985) SHELXS 86. Program for the solution of crystal structures. University

squares using all reflections and minimizing the function  $\sum w(F_o^2 - kF_c^2)^2$  (refinement on  $F^2$ ). In the anion three out of the eight  $\text{CF}_3$  moieties are disordered (as often happens with this anion) in their nine F atoms, each of which appears to be split into two half F atoms, with occupancy factors of 0.50 each. This disorder has been fully rationalized. All the non-hydrogen atoms, including the F atoms with occupancy 0.50, were refined with anisotropic thermal parameters. The three hydrogen atoms bonded to the methylic atom C(13) of the cation, and the three hydrogen atoms bonded to the corresponding methylic atom C(14), were detected in the final Fourier maps and not refined. All the other hydrogen atoms were placed in their ideal positions (C-H = 0.97 Å), with the thermal parameter  $U$  being 1.10 times that of the carbon atom to which they are attached, and not refined. In the final Fourier map the maximum and minimum residuals were  $+1.48(11) \text{ e}\cdot\text{\AA}^{-3}$  at 0.44 Å from Au, and  $-1.22(11) \text{ e}\cdot\text{\AA}^{-3}$ .

**Table S1.** Full crystallographic data.

|                                         |                                                                                    |
|-----------------------------------------|------------------------------------------------------------------------------------|
| Compound                                | <b>1</b> -[ $\text{B}\{\text{C}_6\text{H}_3(\text{CF}_3)_2\}_4\text{]}_2$          |
| Formula                                 | $\text{C}_{92}\text{H}_{48}\text{Au}_2\text{B}_2\text{F}_{48}\text{N}_4\text{O}_4$ |
| $M$                                     | 2568.91                                                                            |
| Colour                                  | yellow                                                                             |
| Crystal system                          | triclinic                                                                          |
| Space group                             | P-1                                                                                |
| $a/\text{\AA}$                          | 13.0530(6)                                                                         |
| $b/\text{\AA}$                          | 13.5091(6)                                                                         |
| $c/\text{\AA}$                          | 15.1301(7)                                                                         |
| $a/^\circ$                              | 63.879(1)                                                                          |
| $\tilde{b}^\circ$                       | $82551$                                                                            |
| $\tilde{g}^\circ$                       | $767951$                                                                           |
| $V/\text{\AA}^3$                        | 2330.8(2)                                                                          |
| $Z$                                     | 1                                                                                  |
| $F(000)$                                | 1244                                                                               |
| $D_x/\text{g cm}^{-3}$                  | 1.830                                                                              |
| $T/\text{K}$                            | 150                                                                                |
| $I(\text{Mo Ka})$                       | 0.71073                                                                            |
| Crystal dimensions (mm)                 | 0.17 x 0.22 x 0.34                                                                 |
| $\mu(\text{Mo Ka}) / \text{cm}^{-1}$    | 32.80                                                                              |
| Min. and max. transmiss. factors        | 0.805-1.000                                                                        |
| Scan mode                               | w                                                                                  |
| Frame width / °                         | 0.30                                                                               |
| Time per frame / sec                    | 15                                                                                 |
| No. of frames                           | 3060                                                                               |
| Detector-sample distance / cm           | 6.00                                                                               |
| q-range                                 | 3.00-27.00                                                                         |
| Reciprocal space explored               | full sphere                                                                        |
| No. of reflections (total; independent) | 36769, 11918                                                                       |
| $R_{\text{int}}$                        | 0.022                                                                              |

|                                               |              |
|-----------------------------------------------|--------------|
| Final $R_2$ and $R_{2w}$ indices <sup>a</sup> |              |
| ( $F^2$ , all reflections)                    | 0.037, 0.057 |
| Conventional $R_1$ index                      |              |
| [ $I > 2s(I)$ ]                               | 0.021        |
| Reflections with $I > 2s(I)$                  | 11058        |
| No. of variables                              | 758          |
| Goodness of fit <sup>b</sup>                  | 0.943        |

(a)  $R_2 = [S(|F_o^2 - kF_c^2|/SF_o^2)]$ ,  $R_{2w} = [Sw(F_o^2 - kF_c^2)^2/Sw(F_o^2)^2]^{1/2}$

(b)  $[Sw(F_o^2 - kF_c^2)^2/(N_o - N_v)]^{1/2}$ , where  $w = 4F_o^2/s(F_o^2)^2$ ,  
 $s(F_o^2) = [s^2(F_o^2) + (0.04F_o^2)^2]^{1/2}$ ,  $N_o$  is the number of observations and  $N_v$  the number of variables.

### Description of the interionic hydrogen bonds in the packing of $1 \cdot [B\{C_6H_3(CF_3)_2\}_4]_2$

In the packing of  $1 \cdot [B\{C_6H_3(CF_3)_2\}_4]_2$  there are two interionic H...F hydrogen bonds, involving two different anionic fluorine atoms belonging to the same, ordered,  $CF_3$  moiety (in the anion three out of eight  $CF_3$  moieties are disordered), one cationic hydrogen atom, and one anionic hydrogen atom. Fig. S1 shows an isolated cation, including all its hydrogen atoms, with a label for each atom, including hydrogens. Fig. S2 shows an isolated anion, including all its hydrogen atoms, but only two fluorine atoms, those involved in the two hydrogen bonds. The other fluorine atoms have been omitted for clarity. Also in Fig. S2 each shown atom carries its label, including hydrogens. The stronger hydrogen bond is formed by cationic hydrogen atom H(3), bonded to C(8), and fluorine atom F(19), bonded to C(147) (see Figures). Bond and non-bond parameters for this interaction are:

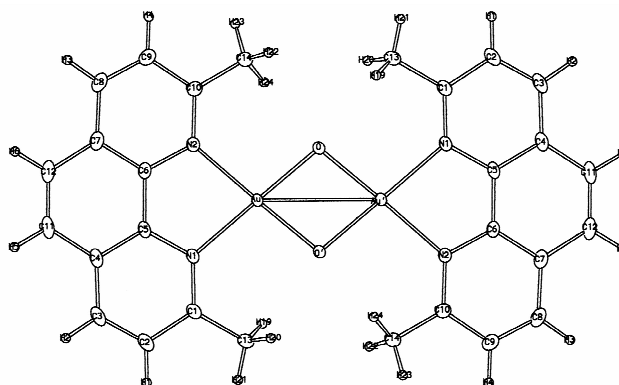

Figure S1

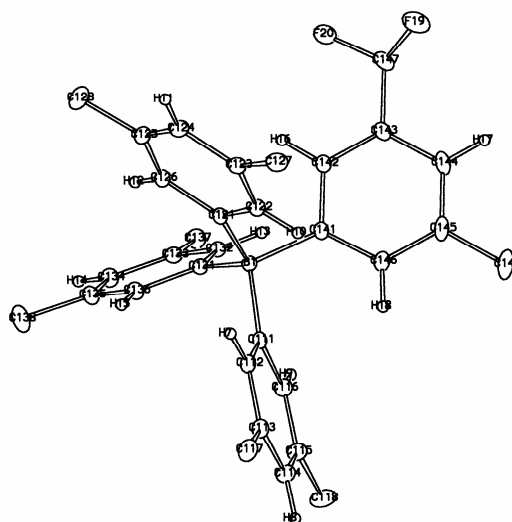

**Figure S2**

C(8)-H(3) = 0.970 Å (hydrogen atom placed in its ideal position)

H(3)⋯F(19) = 2.312 Å

C(8)⋯F(19) = 3.259(3) Å

angle C(8)-H(3)⋯F(19) = 165.2(2)°

The second hydrogen bond is formed by anionic hydrogen atom H(14), bonded to C(134), and fluorine atom F(20), bonded to C(147) (see Fig. S2). Bond and non-bond parameters for this interaction are:

C(134)-H(14) = 0.970 Å (hydrogen atom placed in its ideal position)

H(14)⋯F(20) = 2.498 Å

C(134)⋯F(20) = 3.457(2) Å

angle C(134)-H(14)⋯F(20) = 169.7(1)°

**UV-visible spectrophotometry.** UV-vis absorption spectra **1**-(PF<sub>6</sub>)<sub>2</sub> were recorded on a Varian Cary 50 UV-Vis spectrophotometer. Solutions of **1**-(PF<sub>6</sub>)<sub>2</sub> (10<sup>-5</sup> M) in 50 mM phosphate buffer pH = 7.4 were monitored collecting the electronic spectra over 24 h at room temperature.

**ESI Mass Spectrometry.** Horse heart cytochrome c, red blood cell ubiquitin and bovine erythrocytes superoxide dismutase were purchased from Sigma (C7752, U6253 and S2515, respectively) and used as received. The sample was prepared by mixing equivalent amounts of the three proteins (100 μM) in 25 mM tetramethylammonium acetate buffer (TMeAmAc) (pH 7.4). Then **1**-(PF<sub>6</sub>)<sub>2</sub> was added (3:1 metal/protein ratio) to the solution and incubated at 37 °C for 24h. After a 20-fold dilution with HCOOH 0.1%, ESI-MS spectrum was recorded by direct introduction at 5 μl/min flow rate in an LTQ-Orbitrap

high-resolution mass spectrometer (Thermo, San Jose, CA, USA), equipped with a conventional ESI source. The working conditions were the following: spray voltage 3.1 kV, capillary voltage 45 V and capillary temperature 220 °C. The sheath and the auxiliary gases were set, respectively, at 17 (arbitrary units) and 1 (arbitrary units). For acquisition, Xcalibur 2.0. software (Thermo) was used and monoisotopic and average deconvoluted masses were obtained by using the integrated Xtract tool. For spectrum acquisition a nominal resolution (at m/z 400) of 100,000 was used.

**Tumor Cell Lines.** Twenty-four out of the 36 cell lines were established from patient-derived tumor xenografts passaged subcutaneously in nude mice.<sup>6</sup> The origin of the donor xenografts has been already described.<sup>7,8</sup> The other 12 cell lines were commercially available and purchased from ATCC (Rockville, MD) or DSMZ (Braunschweig, Germany) or were kindly provided by the NCI (Bethesda, MD). The 36 cell line panel included 14 different tumor histotypes, each represented by 1-6 cell lines (see supplementary material). All cells were grown at 37 °C in a humidified atmosphere (95% air, 5% CO<sub>2</sub>) in RPMI 1640 medium (PAA, Cölbe, Germany) supplemented with 10% fetal calf serum (PAA) and 0.1 mg/ml gentamicin (PAA).

**Cytotoxicity Assays (Monolayer Assay) and Compare Analysis.** A modified propidium iodide assay<sup>9</sup> was used to assess the effects of compounds. Tumor derived cell lines were incubated in 96 multi-well plates. After one day, the compounds under test were added to the plates at 5 concentrations in the range from 0.01 µg/ml to 100 µg/ml and left for further four days. The inhibition of proliferation was determined by measuring the DNA content using an aqueous propidium iodide solution (7 µg/ml). Fluorescence was measured using the Cytofluor 4000. All compounds were tested in 2 to 4 independent experiments. In each experiment, all data points were determined in triplicate.

The Compare Algorithm uses *in vitro* activity data to obtain clues as to the mechanism of action of a test compound.<sup>10</sup> The individual IC<sub>50</sub> and IC<sub>70</sub>-values of the test compounds in 36 test cell lines obtained in the monolayer assay were correlated to the corresponding IC<sub>50</sub>/IC<sub>70</sub>-values for 110 standard agents determined in exactly these 36 cell lines. A list of these standard agents is available in the supplementary material (Table 1S). These standard agents represent the main mechanisms of action of

---

<sup>6</sup> Roth T, Burger, A. M., Dengler, W., Willmann, H., Fiebig, H.H. (1999) In: Fiebig HH, Burger, A. M. (ed) Contrib. Oncol., pp. 145-156

<sup>7</sup> Fiebig HH, Dengler, W.A., Roth, T. (1999) In: Fiebig HH, Burger, A. M. (ed) Contrib. Oncol., pp. 29-50

<sup>8</sup> Fiebig HH, Berger D. P., Dengler, W. A., Wallbrecher, E., Winterhalter, B. R. (1992) In: Fiebig HH, Berger, D. P. (ed) Relevance of Tumor Models for Anticancer Drug Development. Karger, Basel, pp. 321-351

<sup>9</sup> Dengler WA, Schulte J, Berger DP, Mertelsmann R, Fiebig HH (1995) Anti-Cancer Drug 6:522-532

<sup>10</sup> Paull KD, Shoemaker RH, Hodes L, Monks A, Scudiero DA, Rubinstein L, Plowman J, Boyd MR (1989) J Natl Cancer I 81:1088-1092; Huang RL, Wallqvist A, Covell DG (2005) Biochem, Pharmacol 69:1009.

current anti-cancer drugs. Similarities between the sensitivity pattern of a test compound and those of standard drugs are expressed quantitatively as Spearman correlation coefficients.<sup>11</sup> High correlations ( $\rho > 0.6$ ) between the sensitivity patterns of two compounds (referred to as Compare-positive) are indicative of similar mechanism of action. Low correlations between the sensitivity profile of a test compound and the profiles of all standard compounds (referred to as Compare-negative) indicate that the mechanism of action of the test compound is not represented by the selected standard compounds.

**Figure S3.** UV-visible absorption spectra of  $1-(PF_6)_2$   $10^{-5}M$  in 50 mM phosphate buffer (pH=7.4) recorded over 24 h at 25°C.

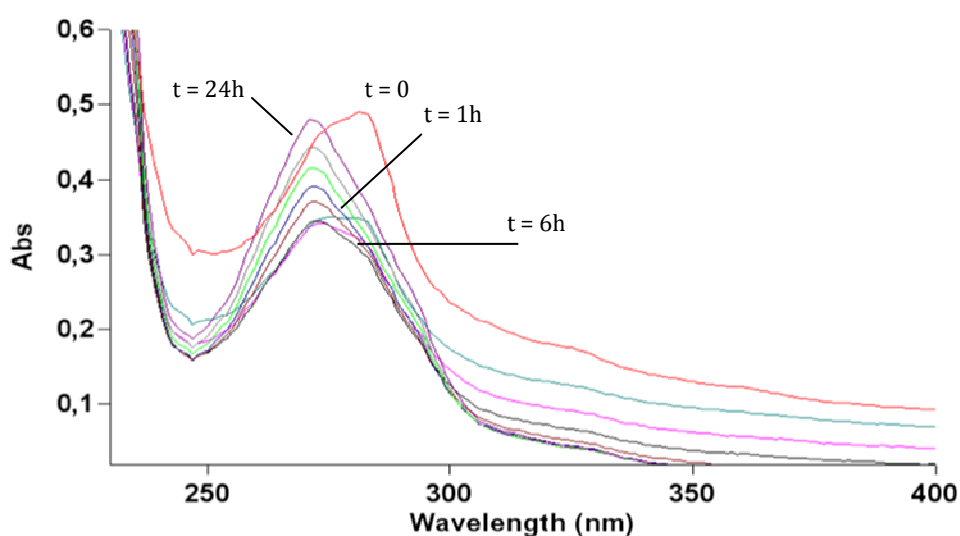

<sup>11</sup> Fang XL, Shao L, Zhang H, Wang SM (2004) J Chem Inf Comp Sci 44:249-257

**Figure S4.** Anticancer activity profile of compound 1-(PF<sub>6</sub>)<sub>2</sub> in a panel of 36 cell lines (IC<sub>70</sub> mean graph).

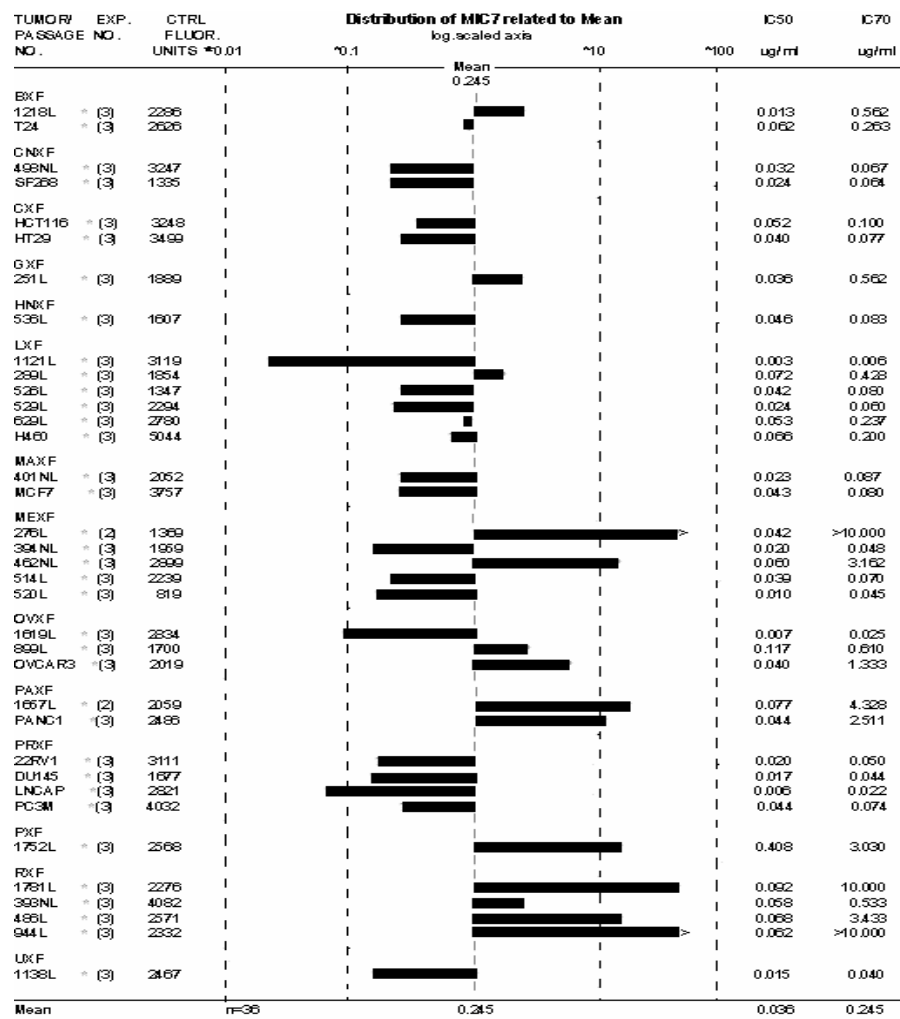



**Table S2.** Reference compounds used for Compare Analysis as available in the Oncotest Database.

| #  | designation 1 Intern | designation 2                         | MoA 1                      | MoA 2                 | #   | designation 1 Intern | designation 2                              | MoA 1                      | MoA 2           |
|----|----------------------|---------------------------------------|----------------------------|-----------------------|-----|----------------------|--------------------------------------------|----------------------------|-----------------|
| 1  | BCNU                 | Carmustin                             | Alkylating Agent           | Nitrosourea           | 56  | IRESSA               | Gefitinib                                  | EGF/HER2 Inh.              |                 |
| 2  | HECNU                | Chloroethyl-nitroso-hydroxyethyl-urea | Alkylating Agent           | Nitrosourea           | 57  | LAPAT                | Lapatinib                                  | EGF/HER2 Inh.              |                 |
| 3  | CCNU                 | Lomustin                              | Alkylating Agent           | Nitrosourea           | 58  | PD168393             | PD 168393                                  | EGF/HER2 Inh.              |                 |
| 4  | MCCNU                | Semustine, Methyl-CCNU                | Alkylating Agent           | Nitrosourea           | 59  | MANUA                | Manumycin A                                | Farnesyl Transf. Inh.      |                 |
| 5  | CARBOPLA             | Carboplatin                           | Alkylating Agent           | Platin                | 60  | ACDINAL              | Acetylinaline, CI-994                      | HDAC inh.                  | Benzamide       |
| 6  | PLAT                 | Cisplatin                             | Alkylating Agent           | Platin                | 61  | MS275                | MS-275                                     | HDAC inh.                  | Benzamide       |
| 7  | OXPLAT               | Oxaliplatin                           | Alkylating Agent           | Platin                | 62  | APICID               | Apicidin                                   | HDAC inh.                  | Cyclic Peptide  |
| 8  | TETPLAT              | Tetraplatin                           | Alkylating Agent           | Platin                | 63  | N630176              | Depsipeptide                               | HDAC inh.                  | Cyclic Peptide  |
| 9  | CHLORAMB             | Chlorambuzil                          | Alkylating Agent           |                       | 64  | M344                 | M344                                       | HDAC inh.                  | Hydroxamate     |
| 10 | CYACT                | Cyclophosphamid (act. metabolite)     | Alkylating Agent           |                       | 65  | SBHA                 | Suberic Bishydroxamat                      | HDAC inh.                  | Hydroxamate     |
| 11 | AZQ                  | Diaziquone                            | Alkylating Agent           |                       | 66  | SAHA                 | Suberoylanilide hydroxamic acid            | HDAC inh.                  | Hydroxamate     |
| 12 | NCI17                | Hepsulfam                             | Alkylating Agent           |                       | 67  | TRISTAT              | Trichostatin A                             | HDAC inh.                  | Hydroxamate     |
| 13 | MITO                 | Mitomycin C                           | Alkylating Agent           |                       | 68  | NM07                 | 17AAG                                      | HSP90 inh                  |                 |
| 14 | TEX                  | Teroxirone, Triglycidylisocyanurate   | Alkylating Agent           |                       | 69  | NM10                 | 17DMAG                                     | HSP90 inh                  |                 |
| 15 | THT                  | Thio-tepa                             | Alkylating Agent           |                       | 70  | NCI1                 | Rapamycin                                  | mTOR-Inh                   |                 |
| 16 | TREO                 | Treosulfan                            | Alkylating Agent           |                       | 71  | LY294002             | LY-294,002                                 | PI3K/AKT Inh.              |                 |
| 17 | MTX                  | Methotrexat                           | Antimetabolite             | Folic acid activation | 72  | MGAG                 | Mitoguzone, Guanylhydrazone                | Polyamynsyn. Inh.          | SAMD Inh.       |
| 18 | TOMUDEX              | Raltitrexed                           | Antimetabolite             | Folic acid activation | 73  | VELCADE              | Bortezomib, PS-341                         | Proteasome                 |                 |
| 19 | DON                  | 6-Diazo-5-oxo-L-norleucine            | Antimetabolite             | GMP Synth. Inh.       | 74  | EPM                  | Epoxomicin                                 | Proteasome                 |                 |
| 20 | ACV                  | Acivicin, Antibiotic AT-125           | Antimetabolite             | GMP Synth. Inh.       | 75  | MG132                | MG-132                                     | Proteasome                 |                 |
| 21 | MP                   | 6-Mercaptopurin                       | Antimetabolite             | Purin-Analoga         | 76  | TPA                  | Tyrospeptin A                              | Proteasome                 |                 |
| 22 | THG                  | 6-Thioguanin, 6-TG                    | Antimetabolite             | Purin-Analoga         | 77  | DAS                  | Anguidine                                  | Protein-Syn. Inh.          |                 |
| 23 | CDA                  | Cladribin                             | Antimetabolite             | Purin-Analoga         | 78  | HHT                  | Homoharringtonine                          | Protein-Syn. Inh.          |                 |
| 24 | FUDR                 | 5-Fluoro-2'-deoxyuridine, Floxurine   | Antimetabolite             | Pyrimidin-Analoga     | 79  | ML1                  | Mistlektin 1                               | Protein-Syn. Inh.          |                 |
| 25 | SFU                  | 5-Fluorouracil (s.a. N88)             | Antimetabolite             | Pyrimidin-Analoga     | 80  | PSPA                 | Pentyl-Spansomycin                         | Protein-Syn. Inh.          |                 |
| 26 | FTF                  | Ftorafur, Fluorofur                   | Antimetabolite             | Pyrimidin-Analoga     | 81  | NCI2                 | Phyllanthoside                             | Protein-Syn. Inh.          |                 |
| 27 | GEMZAR               | Gemcitabine                           | Antimetabolite             | Pyrimidin-Analoga     | 82  | SPA                  | Spansomycin                                | Protein-Syn. Inh.          |                 |
| 28 | CCD                  | Cyclocytidine, Ancitabine HCl         | Antimetabolite             |                       | 83  | HYPHRE               | Fenretinide, H-(4-Hydroxyphenyl)retinamide | Retinoic acid analog       |                 |
| 29 | NCI14                | Cyclopentenylcytosine                 | Antimetabolite             |                       | 84  | RIFA                 | Rifamycin SV                               | RNA Synth.                 | RNA-Polym. Inh. |
| 30 | ARAC                 | Cytarabin, ara-C                      | Antimetabolite             |                       | 85  | HU                   | Hydroxyharnstoff                           | RNA Synth.                 | RNR Inh.        |
| 31 | DUP785               | DUP785, Brequinar sodium              | Antimetabolite             |                       | 86  | CMA3                 | Chromomycin A3                             | RNA Synth.                 |                 |
| 32 | N224131              | PALA, L-Aspartic acid                 | Antimetabolite             |                       | 87  | APIGENIN             | Apigenin                                   | Serin/Threonin Kinase Inh. |                 |
| 33 | ALIMTA               | Pemetrexed, LY231514                  | Antimetabolite             |                       | 88  | SB202190             | SB-202190                                  | Serin/Threonin Kinase Inh. |                 |
| 34 | DASATNB              | Dasatinib                             | Bcl/Abl Kinhase Inh.       |                       | 89  | MST312               | MST-312                                    | Telomerase Inh             |                 |
| 35 | GLEEVEC              | Imatinib Mesylat, STI571              | Bcl/Abl Kinhase Inh.       |                       | 90  | CAMPTO               | Camptothecin                               | Topoisomerase I Inh.       |                 |
| 36 | FLT312               | Bisinoilatderivative                  | Broad-spectrum Kinase inh. | FLT3-inhibitor        | 91  | SN38                 | Irinotecan                                 | Topoisomerase I Inh.       |                 |
| 37 | VATALNB              | Vatalinib                             | Broad-spectrum Kinase inh. | KDR/PDGFR             | 92  | TOPOT                | Topotecan Hydrochlorid                     | Topoisomerase I Inh.       |                 |
| 38 | SORAFNB              | Sorafenib, Nexavar                    | Broad-spectrum Kinase inh. | MultiKinase-inh.      | 93  | DACT                 | Actinomycin-D                              | Topoisomerase II Inh.      |                 |
| 39 | SUNITNB              | Sunitinib, Eurasia                    | Broad-spectrum Kinase inh. | MultiKinase-inh.      | 94  | AMSA                 | Amsacrin                                   | Topoisomerase II Inh.      |                 |
| 40 | STAUROSP             | Staurosporine                         | Broad-spectrum Kinase inh. | PKC                   | 95  | BLEO                 | Bleomycin Sulfat                           | Topoisomerase II Inh.      |                 |
| 41 | UCN01                | UCN-01 (N638850)                      | Broad-spectrum Kinase inh. | PKC                   | 96  | DAUNORUB             | Daunorubicin                               | Topoisomerase II Inh.      |                 |
| 42 | TRD                  | Tetrandrine                           | Ca2+-channel blocker       |                       | 97  | ADR                  | Doxorubicin                                | Topoisomerase II Inh.      |                 |
| 43 | APL                  | Alsterpaulone                         | CDK Inh                    |                       | 98  | VP16                 | Etoposide                                  | Topoisomerase II Inh.      |                 |
| 44 | CYC202               | CYC202                                | CDK Inh                    |                       | 99  | IDA                  | Idarubicin                                 | Topoisomerase II Inh.      |                 |
| 45 | FCL                  | Fascaplysin                           | CDK Inh                    |                       | 100 | MITOXANT             | Mitoxantron Hydrochlorid                   | Topoisomerase II Inh.      |                 |
| 46 | N101                 | Flavopiridol                          | CDK Inh                    |                       | 101 | NCI15                | Pyrazolo-acridine-propanamine              | Topoisomerase II Inh.      |                 |
| 47 | PURA                 | Purvalanol A                          | CDK Inh                    |                       | 102 | VM26                 | Teniposid                                  | Topoisomerase II Inh.      |                 |
| 48 | SU9516               | SU9516                                | CDK Inh                    |                       | 103 | TXT                  | Docetaxel                                  | Tubulin interactin         | Taxoid          |
| 49 | NIME                 | Nimesulide                            | COX II Inh.                |                       | 104 | TAXQL                | Paclitaxel, Taxol                          | Tubulin interactin         | Taxoid          |
| 50 | APHIDICO             | Aphidicolin                           | DNA-Synth. Inh.            |                       | 105 | VELBE                | Vinblastin Sulfat                          | Tubulin interactin         | Vincaalcaloid   |
| 51 | W020                 | Aphidicolin glycinate                 | DNA-Synth. Inh.            |                       | 106 | VCR                  | Vincristin Sulfat                          | Tubulin interactin         | Vincaalcaloid   |
| 52 | ECH                  | Echinomycin A                         | DNA-Synth. Inh.            |                       | 107 | VIND                 | Vindesin Sulfat                            | Tubulin interactin         | Vincaalcaloid   |
| 53 | MTM                  | Mitramycin                            | DNA-Synth. Inh.            |                       | 108 | NAVELBIN             | Vinorebin                                  | Tubulin interactin         | Vincaalcaloid   |
| 54 | DTB                  | Decitabine                            | DNMT inh.                  |                       | 109 | STC                  | S-trityl-L-cysteine                        | Eg5 inhibitor              |                 |
| 55 | TARCEVA              | Erlotinib, OSI-774                    | EGF/HER2 Inh.              |                       | 110 | NCI6                 | Pancratistatin                             |                            |                 |

# checkCIF/PLATON report

No syntax errors found. CIF dictionary Interpreting this report

## Datablock: compound\_1.B{C6H3CF324}2

---

Bond precision: C-C = 0.0030 A Wavelength=0.71073

Cell: a=13.0530(6) b=13.5091(6) c=15.1301(7)  
alpha=63.879(1) beta=82.550(1) gamma=76.795(1)

Temperature: 150 K

|                | Calculated                            | Reported                 |
|----------------|---------------------------------------|--------------------------|
| Volume         | 2330.84(19)                           | 2330.8(2)                |
| Space group    | P -1                                  | P -1                     |
| Hall group     | -P 1                                  | ?                        |
| Moiety formula | C32 H12 B F24, 0.5(C28 H24 Au2 N4 O2) | ?                        |
| Sum formula    | C46 H24 Au B F24 N2 O                 | C92 H48 AU2 B2 F48 N4 O2 |
| Mr             | 1284.45                               | 2568.91                  |
| Dx,g cm-3      | 1.830                                 | 1.830                    |
| Z              | 2                                     | 1                        |
| Mu (mm-1)      | 3.291                                 | 3.280                    |
| F000           | 1244.0                                | 1244.0                   |
| F000'          | 1241.06                               |                          |
| h,k,lmax       | 16,17,19                              |                          |
| Nref           | 10179                                 |                          |
| Tmin,Tmax      | 0.425,0.573                           | 0.805,1.000              |
| Tmin'          | 0.325                                 |                          |

Correction method= EMPIRICAL

Data completeness= 0.000

Theta(max)=

R(reflections)= 0.0370(\*\*\*\*\*)

wR2(reflections)= \*\*\*\*\*( 11918)

S = 0.943

Npar= 758

---

The following ALERTS were generated. Each ALERT has the format  
**test-name\_ALERT\_alert-type\_alert-level**.  
Click on the hyperlinks for more details of the test.

---

### Alert level A

|                                                                    |         |
|--------------------------------------------------------------------|---------|
| PLAT022_ALERT_3_A Ratio Unique / Expected Reflections too Low .... | 0.00    |
| PLAT026_ALERT_3_A Ratio Observed / Unique Reflections too Low .... | 0 Perc. |
| PLAT215_ALERT_3_A Disordered F10A has ADP max/min Ratio .....      | 5.10    |
| PLAT242_ALERT_2_A Check Low Ueq as Compared to Neighbors for       | C128    |
| PLAT224_ALERT_1_A Ueq(Rep) and Ueq(Calc) differ by -0.007 Ang**2 . | F11A    |

---

**Alert level B**

|                   |                 |                                  |       |            |
|-------------------|-----------------|----------------------------------|-------|------------|
| PLAT215_ALERT_3_B | Disordered F12B | has ADP max/min Ratio            | ..... | 4.50       |
| PLAT215_ALERT_3_B | Disordered F22A | has ADP max/min Ratio            | ..... | 4.40       |
| PLAT215_ALERT_3_B | Disordered F22B | has ADP max/min Ratio            | ..... | 4.10       |
| PLAT215_ALERT_3_B | Disordered F24A | has ADP max/min Ratio            | ..... | 4.30       |
| PLAT242_ALERT_2_B | Check Low       | Ueq as Compared to Neighbors for |       | C138       |
| PLAT242_ALERT_2_B | Check Low       | Ueq as Compared to Neighbors for |       | C148       |
| PLAT731_ALERT_1_B | Bond Calc       | 3.0187(2), Rep 3.0190(10)        | ..... | 5.00 su-Ra |
|                   | AU -AU          | 1.555 2.566                      |       |            |

---

**Alert level C**

|                   |                                               |                                  |       |              |
|-------------------|-----------------------------------------------|----------------------------------|-------|--------------|
| PLAT029_ALERT_3_C | _diffn_measured_fraction_theta_full           | Low                              | ..... | 0.96         |
| PLAT215_ALERT_3_C | Disordered F10B                               | has ADP max/min Ratio            | ..... | 3.50         |
| PLAT215_ALERT_3_C | Disordered F11A                               | has ADP max/min Ratio            | ..... | 3.80         |
| PLAT215_ALERT_3_C | Disordered F12A                               | has ADP max/min Ratio            | ..... | 3.40         |
| PLAT215_ALERT_3_C | Disordered F16A                               | has ADP max/min Ratio            | ..... | 3.80         |
| PLAT215_ALERT_3_C | Disordered F16B                               | has ADP max/min Ratio            | ..... | 4.00         |
| PLAT215_ALERT_3_C | Disordered F18A                               | has ADP max/min Ratio            | ..... | 3.30         |
| PLAT215_ALERT_3_C | Disordered F23A                               | has ADP max/min Ratio            | ..... | 3.40         |
| PLAT215_ALERT_3_C | Disordered F23B                               | has ADP max/min Ratio            | ..... | 3.50         |
| PLAT215_ALERT_3_C | Disordered F24B                               | has ADP max/min Ratio            | ..... | 3.20         |
| PLAT220_ALERT_2_C | Large Non-Solvent                             | F Ueq(max)/Ueq(min)              | ...   | 3.46 Ratio   |
| PLAT242_ALERT_2_C | Check Low                                     | Ueq as Compared to Neighbors for |       | C117         |
| PLAT242_ALERT_2_C | Check Low                                     | Ueq as Compared to Neighbors for |       | C147         |
| PLAT041_ALERT_1_C | Calc. and Reported SumFormula                 | Strings Differ                   |       | ?            |
| PLAT045_ALERT_1_C | Calculated and Reported Z                     | Differ by                        | ..... | 2.00 Ratio   |
| PLAT701_ALERT_1_C | Bond Calc                                     | 3.0187(2), Rep 3.0190(10), Dev.. |       | 1.50 Sigma   |
|                   | AU -AU                                        | 1.555 2.566                      |       |              |
| PLAT751_ALERT_4_C | Bond Calc                                     | 0.97000, Rep 0.970(2)            | ..... | Senseless su |
|                   | C3 -H2                                        | 1.555 1.555                      |       |              |
| PLAT790_ALERT_4_C | Centre of Gravity not Within Unit Cell: Resd. | #                                |       | 1            |
|                   | C32 H12 B F24                                 |                                  |       |              |

---

**Alert level G**

|                   |                                                 |                                                                                |  |            |
|-------------------|-------------------------------------------------|--------------------------------------------------------------------------------|--|------------|
| GOODF01_ALERT_1_G | _refine_ls_goodness_of_fit_obs                  | is an old dataname which has been superceded by _refine_ls_goodness_of_fit_ref |  |            |
| RFACG01_ALERT_3_G | _refine_ls_R_factor_obs                         | is an old dataname which has been superceded by _refine_ls_R_factor_gt         |  |            |
| RFACR01_ALERT_3_G | _refine_ls_wR_factor_obs                        | is an old dataname which has been superceded by _refine_ls_wR_factor_ref       |  |            |
| SHFSU01_ALERT_2_G | _refine_ls_shift/esd_max                        | is an old dataname which has been superceded by _refine_ls_shift/su_max        |  |            |
| PLAT301_ALERT_3_G | Note: Main Residue Disorder                     | .....                                                                          |  | 9.00 Perc. |
| PLAT154_ALERT_1_G | The su's on the Cell Angles are Equal           | (x 10000)                                                                      |  | 100 Deg.   |
| PLAT779_ALERT_4_G | Suspect or Irrelevant (Bond) Angle in CIF       | .....                                                                          |  | 15.40 Deg. |
|                   | F10A -C128 -F10B                                | 1.555 1.555 1.555                                                              |  |            |
| PLAT779_ALERT_4_G | Suspect or Irrelevant (Bond) Angle in CIF       | .....                                                                          |  | 27.50 Deg. |
|                   | F11A -C128 -F11B                                | 1.555 1.555 1.555                                                              |  |            |
| PLAT779_ALERT_4_G | Suspect or Irrelevant (Bond) Angle in CIF       | .....                                                                          |  | 28.90 Deg. |
|                   | F12A -C128 -F12B                                | 1.555 1.555 1.555                                                              |  |            |
| PLAT779_ALERT_4_G | Suspect or Irrelevant (Bond) Angle in CIF       | .....                                                                          |  | 30.10 Deg. |
|                   | F16A -C138 -F16B                                | 1.555 1.555 1.555                                                              |  |            |
| PLAT779_ALERT_4_G | Suspect or Irrelevant (Bond) Angle in CIF       | .....                                                                          |  | 39.80 Deg. |
|                   | F17A -C138 -F17B                                | 1.555 1.555 1.555                                                              |  |            |
| PLAT779_ALERT_4_G | Suspect or Irrelevant (Bond) Angle in CIF       | .....                                                                          |  | 41.70 Deg. |
|                   | F18A -C138 -F18B                                | 1.555 1.555 1.555                                                              |  |            |
| PLAT779_ALERT_4_G | Suspect or Irrelevant (Bond) Angle in CIF       | .....                                                                          |  | 33.80 Deg. |
|                   | F22A -C148 -F22B                                | 1.555 1.555 1.555                                                              |  |            |
| PLAT808_ALERT_5_G | No Parsable SHELXL style Weighting Scheme Found |                                                                                |  | !          |

- 
- 5 **ALERT level A** = In general: serious problem  
7 **ALERT level B** = Potentially serious problem  
18 **ALERT level C** = Check and explain  
14 **ALERT level G** = General alerts; check
- 7 ALERT type 1 CIF construction/syntax error, inconsistent or missing data  
7 ALERT type 2 Indicator that the structure model may be wrong or deficient  
20 ALERT type 3 Indicator that the structure quality may be low  
9 ALERT type 4 Improvement, methodology, query or suggestion  
1 ALERT type 5 Informative message, check
- 

Publication of your CIF in IUCr journals

A basic structural check has been run on your CIF. These basic checks will be run on all CIFs submitted for publication in IUCr journals (*Acta Crystallographica*, *Journal of Applied Crystallography*, *Journal of Synchrotron Radiation*); however, if you intend to submit to *Acta Crystallographica Section C or E*, you should make sure that full publication checks are run on the final version of your CIF prior to submission.

Publication of your CIF in other journals

Please refer to the *Notes for Authors* of the relevant journal for any special instructions relating to CIF submission.

---

PLATON version of 13/08/2009; check.def file version of 12/08/2009

Datablock compound\_1B(C6H3CF324)2 - ellipsoid plot

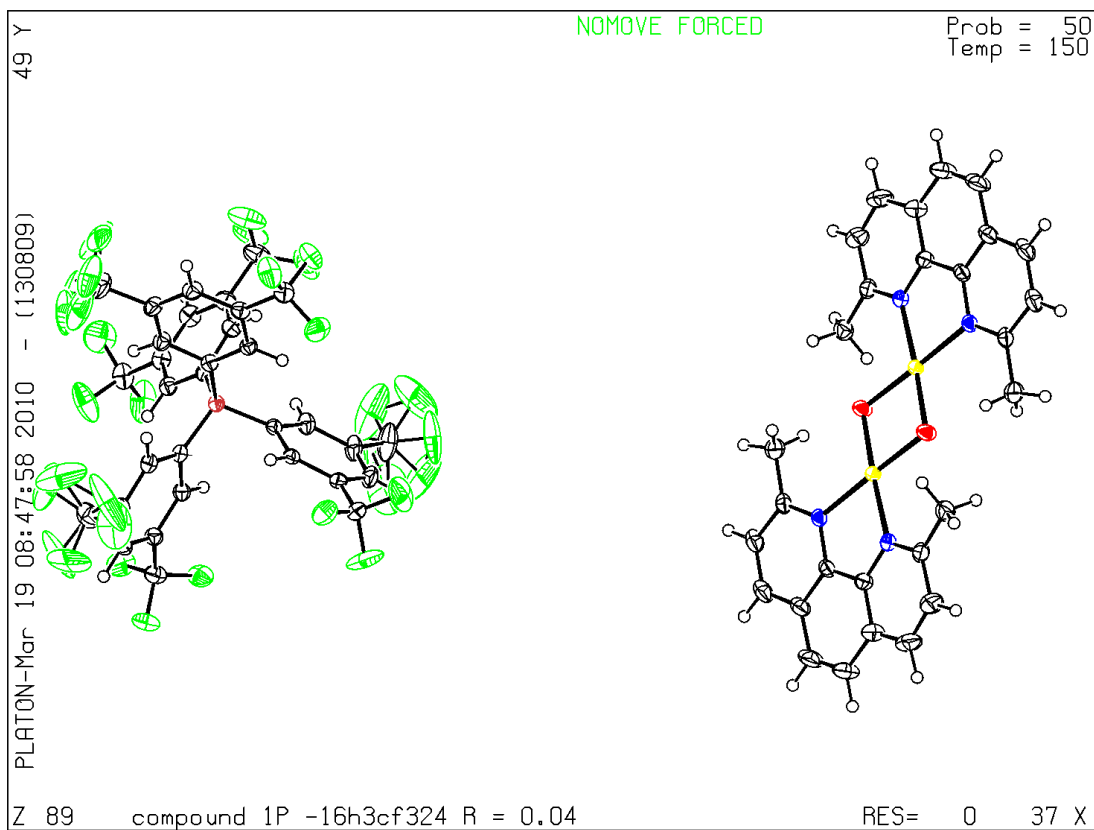

Supplement: ml100097f_si_001.pdf [file ml100097f_si_001.pdf]
